# Supplementary material for: Self-healing hydrogel sensors with multiple shape memory properties for human motion monitoring
Source: Royal Society of Chemistry journal article supplement (doi:10.1039/d0nj04923a), 2020-11-26
Supplement: d0nj04923a1.pdf [file d0nj04923a1.pdf]

## supporting information for

### **Self-healing hydrogel sensors with multi-shape memory properties for human motion monitoring**

Yuwen Chen<sup>a†</sup>, Shengping Dai<sup>b†</sup>, Hao Zhu<sup>a</sup>, Hongwei Hu<sup>a,b</sup>, Ningyi Yuan<sup>a\*</sup> and Jianning Ding<sup>a,b\*</sup>

a Jiangsu Collaborative Innovation Center for Photovoltaic Science and Engineering, Jiangsu Province Cultivation base for State Key Laboratory of Photovoltaic Science and Technology, Changzhou University, Changzhou University, Changzhou 213164, P. R. China.

b Institute of Intelligent flexible Mechatronics, Jiangsu University, Zhenjiang, 212013, China.

† These authors contributed equally to this work.

\* Email: dingjn@ujs.edu.cn; nyuan@cczu.edu.cn.

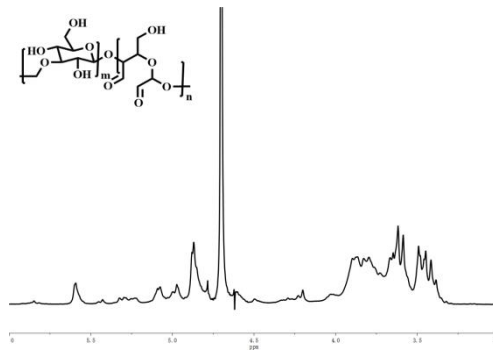

S1.  $^1\text{H}$  NMR spectrum of the oxidized dextran (Odex) in  $\text{D}_2\text{O}$ .

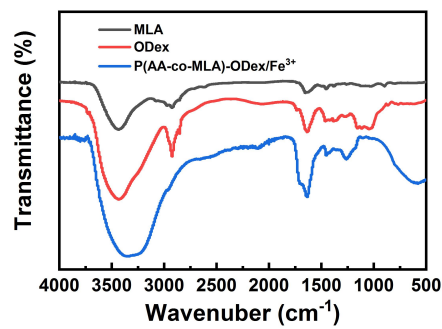

S2. FTIR spectra of  $\text{P}(\text{AA-co-MLA})\text{-ODex/Fe}^{3+}$  hydrogel, MLA and ODex.

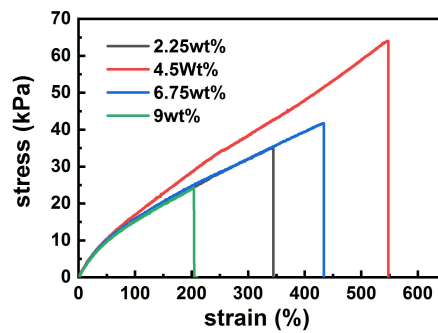

S3. Tensile properties of hydrogels with various contents of ODex.

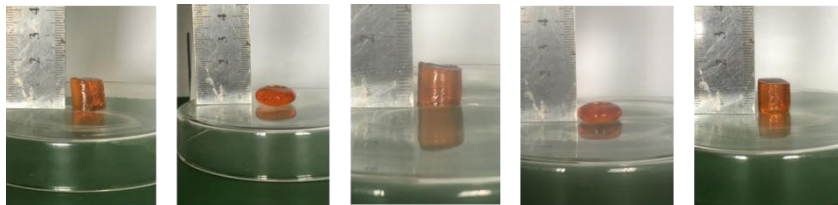

S4. Schematic diagram of hydrogel compression and recovery.

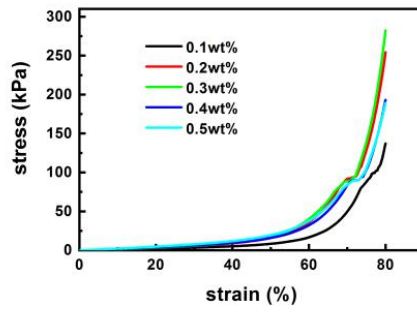

S5. Compression properties of hydrogels with different Fe<sup>3+</sup> contents.

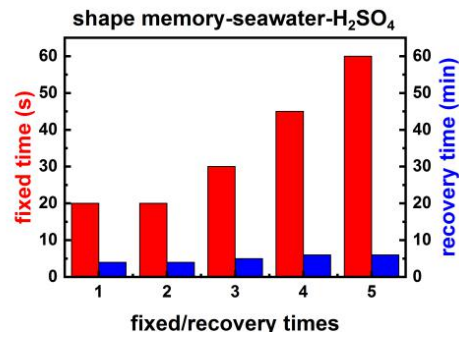

S6. Shape memory effects of hydrogels in seawater.

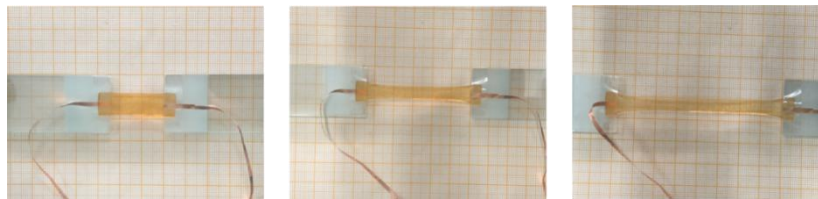

S7. Schematic diagram of resistance sensor increasing with tensile strain.

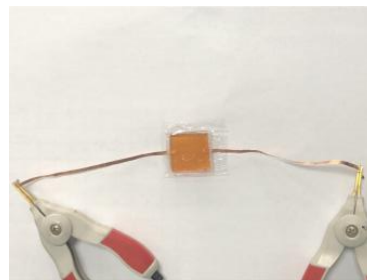

S8. capacitive pressure sensor.

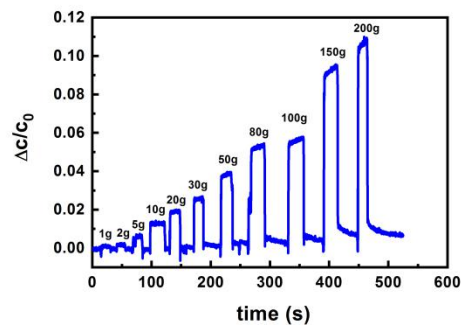

S9. Variation of the relative capacitance under various loads.
